# Supplementary material for: VEGF-induced intracellular Ca2+ oscillations are down-regulated and do not stimulate angiogenesis in breast cancer-derived endothelial colony forming cells
Source: PubMed Central journal article supplement (PMC5707017; doi:10.18632/oncotarget.20255), 2017-08-14
Supplement: oncotarget-08-95223-s001.pdf [file oncotarget-08-95223-s001.pdf]

## VEGF-induced intracellular $\text{Ca}^{2+}$ oscillations are down-regulated and do not stimulate angiogenesis in breast cancer-derived endothelial colony forming cells

### SUPPLEMENTARY MATERIALS

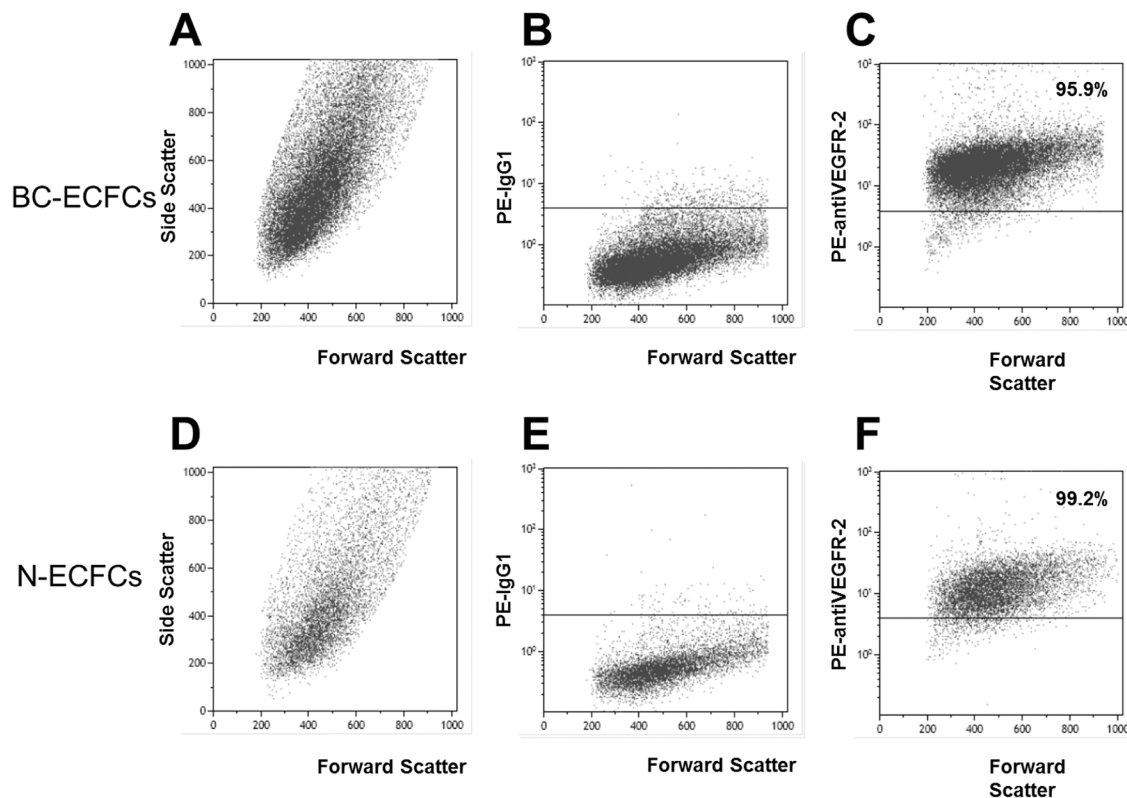

**Supplementary Figure 1: Comparable expression of VEGFR-2 on normal and breast cancer-derived endothelial colony forming cells.** Viable cultured ECFCs, as shown by the typical picture in the forward scatter/side scatter plots (A and D), stained with the PE-IgG1 isotype control (B and E) and with the Pe-anti-VEGFR-2 antibody (C and F).

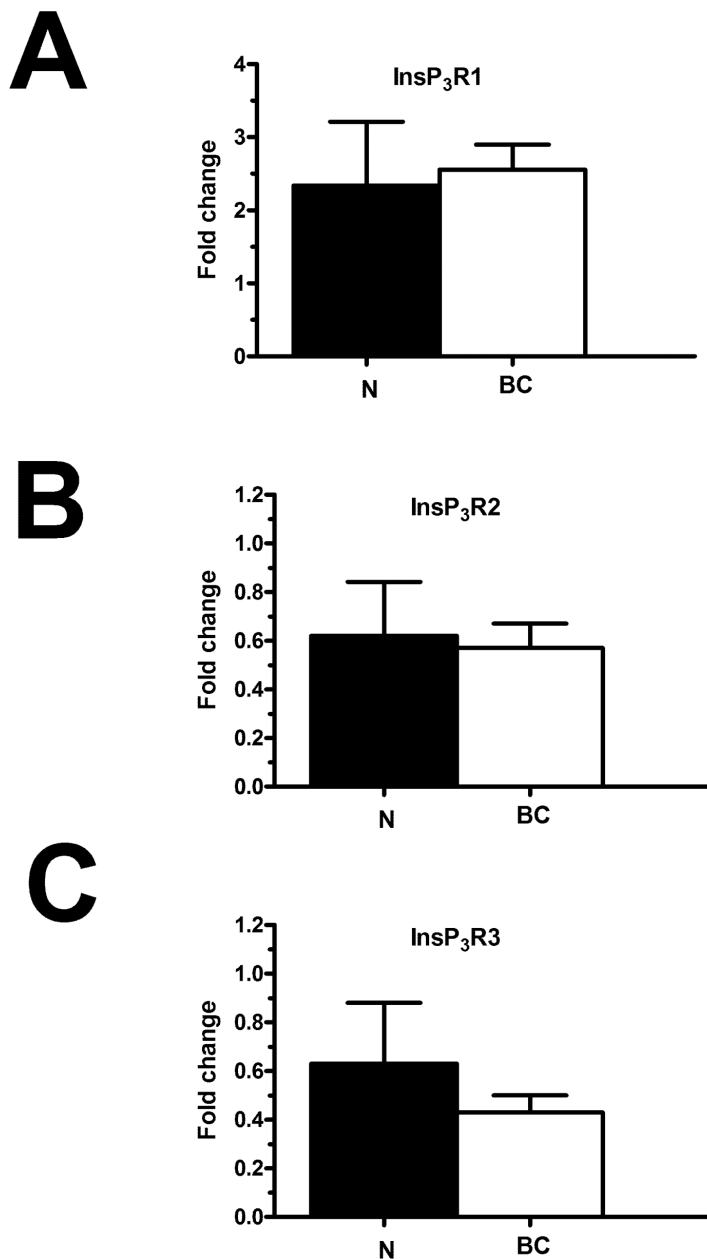

**Supplementary Figure 2: InsP<sub>3</sub> receptors are normally expressed in breast cancer-derived endothelial colony forming cells.** There is no difference in the expression of InsP<sub>3</sub>R1 (A), InsP<sub>3</sub>R2 (B) and InsP<sub>3</sub>R3 (C) between normal and breast cancer-derived ECFCs. mRNA levels were measured by RT-PCR relative to the  $\beta$ -actin internal standard (see Materials and Methods) and the values obtained were reported as  $\Delta$ Ct. Bars represent the mean $\pm$ SE of at least 4 different experiments each from different RNA extracts. \*P<0.05 versus InsP<sub>3</sub>R1 (1-way ANOVA followed by Newman-Keuls's Q test). The PCR products were of the expected size: InsP<sub>3</sub>R1, 180 bp; InsP<sub>3</sub>R2, 158 bp; InsP<sub>3</sub>R3, 173 bp. The specific primers described in Supplementary Table 2 have been utilized to examine the expression levels of InsP<sub>3</sub>R transcripts.

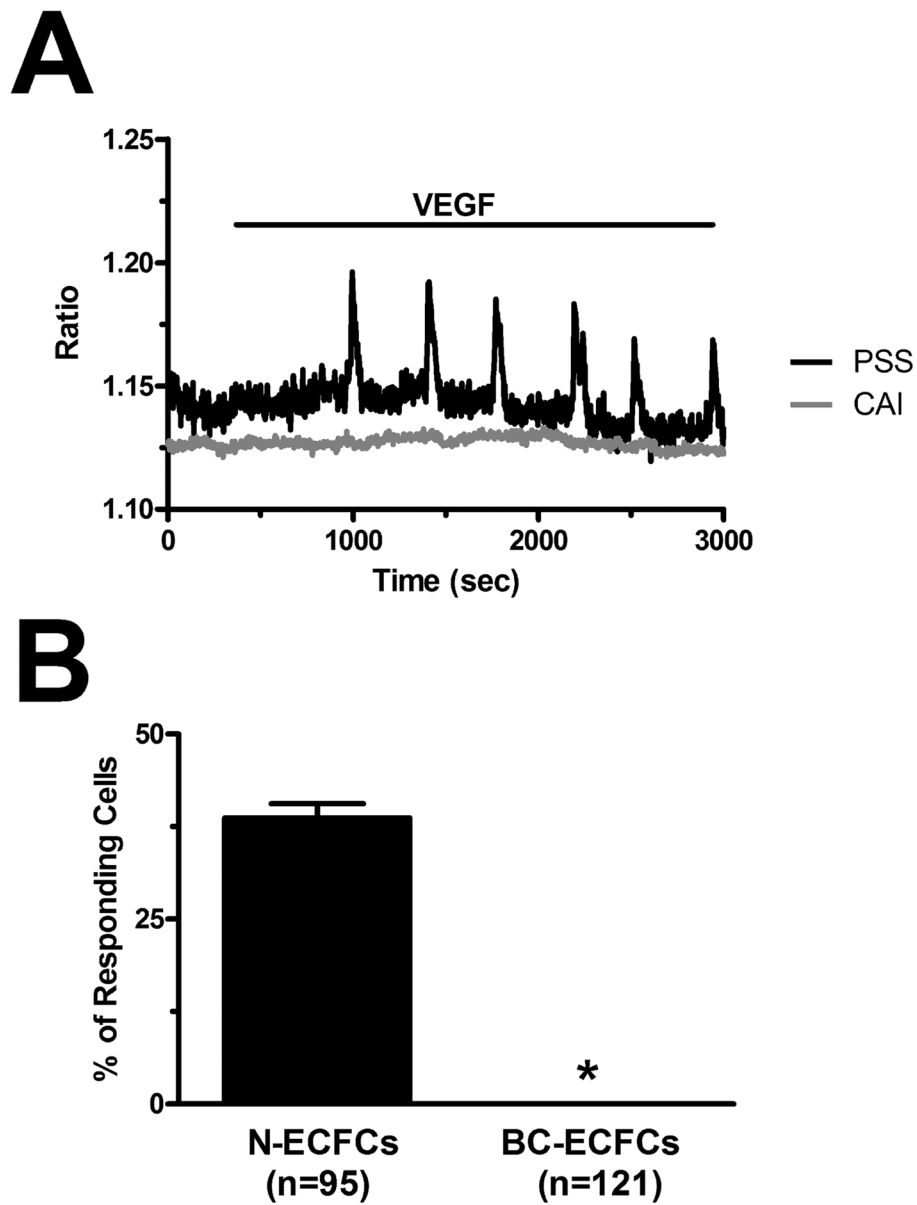

**Supplementary Figure 3: CAI inhibits VEGF-induced intracellular  $\text{Ca}^{2+}$  oscillations in breast cancer-derived endothelial colony forming cells. (A), CAI (10  $\mu\text{M}$ , 20 min) prevents VEGF-induced intracellular  $\text{Ca}^{2+}$  spikes in BC-ECFCs. (B), mean $\pm$ SE of the percentage of VEGF-responding cells in the absence and the presence of CAI. The asterisk indicates  $p < 0.05$ .**

**Supplementary Table 1: Primer sequences used for real time reverse transcription/polymerase chain reaction of InsP<sub>3</sub> receptors**

| Gene                 | Primer sequences                                            | Size (bp)                     | Accession number |                 |
|----------------------|-------------------------------------------------------------|-------------------------------|------------------|-----------------|
| InsP <sub>3</sub> R1 | Forward                                                     | 5'- TCAACAAACTGCACCACGCT -3'  | 180              | ENSG00000150995 |
|                      | Reverse                                                     | 5'- CTCTCATGGCATTCTTCTCC -3'  |                  |                 |
| InsP <sub>3</sub> R2 | Forward                                                     | 5'- ACCTTGGG GTTAGTGGATGA -3' | 158              | ENSG00000123104 |
|                      | Reverse                                                     | 5'- CCTTGTTTGGCTTGCTTTGC -3'  |                  |                 |
| InsP <sub>3</sub> R3 | Forward                                                     | 5'- TGGCTTCATCAGCACTTTGG -3'  | 173              | ENSG00000096433 |
|                      | Reverse                                                     | 5'- TGTCCTGCTTAGTCTGCTTG -3'  |                  |                 |
| β-actin              | Hs_ACTB_1_SG, QuantiTect Primer Assay<br>QT00095431, Qiagen |                               | 146              | NM_001101       |

**Supplementary Table 2: Primer sequences used for real time reverse transcription/polymerase chain reaction of TRPC1-7, Stim1-2 and Orai1-3**

| Gene           | Primer sequences | Size (bp)                                                | Accession number |                                                                                                                                                           |
|----------------|------------------|----------------------------------------------------------|------------------|-----------------------------------------------------------------------------------------------------------------------------------------------------------|
| TRPC1          | Forward          | 5'-ATCCTACACTGGTGGCAGAA-3'                               | 307              | NM_003304.4                                                                                                                                               |
|                | Reverse          | 5'-AACAAAGCAAAGCAGGTGCC-3'                               |                  |                                                                                                                                                           |
| TRPC3          | Forward          | 5'-GGAGATCTGGAATCAGCAGA-3'                               | 336              | NM_001130698.1 variant 1                                                                                                                                  |
|                | Reverse          | 5'-AAGCAGACCCAGGAAGATGA-3'                               |                  | NM_003305.2 variant 2                                                                                                                                     |
| TRPC4          | Forward          | 5'-ACCTGGGACCTCTGCAAATA-3'                               | 300              | NM_016179.2 variant alpha                                                                                                                                 |
|                | Reverse          | 5'-ACATGGTGGCACCAACAAAC-3'                               |                  | NM_001135955.1 variant beta<br>NM_001135956.1 variant gamma<br>NM_001135957.1 variant delta<br>NM_003306.1 variant epsilon<br>NM_001135958.1 variant zeta |
| TRPC5          | Forward          | 5'-GAGATGACCACAGTGAAGAG-3'                               | 221              | NM_012471.2                                                                                                                                               |
|                | Reverse          | 5'-AGACAGCATGGGAAACAGGA-3'                               |                  |                                                                                                                                                           |
| TRPC6          | Forward          | 5'-AGCTGTTCCAGGGCCATAAA-3'                               | 341              | NM_004621.5                                                                                                                                               |
|                | Reverse          | 5'-AAGGAGTTCATAGCGGAGAC-3'                               |                  |                                                                                                                                                           |
| TRPC7          | Forward          | 5'-CACTTGTGGAACCTGCTAGA-3'                               | 387              | NM_020389.1                                                                                                                                               |
|                | Reverse          | 5'-CATCCCAATCATGAAGGCCA-3'                               |                  |                                                                                                                                                           |
| Orai1          | Forward          | 5'-AGTTACTCCGAGGTGATGAG-3'                               | 257              | NM_032790.3                                                                                                                                               |
|                | Reverse          | 5'-ATGCAGGTGCTGATCATGAG-3'                               |                  |                                                                                                                                                           |
| Orai2          | Forward          | 5'-CCATAAGGGCATGGATTACC-3'                               | 334              | NM_001126340.1 variant 1                                                                                                                                  |
|                | Reverse          | 5'-CAGGTTGTGGATGTTGCTCA-3'                               |                  | NM_032831.2 variant 2                                                                                                                                     |
| Orai3          | Forward          | 5'-CCAAGCTCAAAGCTTCCAGCC-3'                              | 159              | NM_152288.2                                                                                                                                               |
|                | Reverse          | 5'-CAAAGAGGTGCACAGCCACCA-3'                              |                  |                                                                                                                                                           |
| Stim1          | Forward          | 5'-CCTCAGTATGAGGAGACCTT-3'                               | 347              | NM_003156.3                                                                                                                                               |
|                | Reverse          | 5'-TCCTGAAGGTCATGCAGACT-3'                               |                  |                                                                                                                                                           |
| Stim2          | Forward          | 5'-AAACACAGCCATCTGCACAG-3'                               | 186              | NM_020860.2                                                                                                                                               |
|                | Reverse          | 5'-GGGAAGTGTTCGTTCCCTTTGA-3'                             |                  |                                                                                                                                                           |
| $\beta$ -actin |                  | Hs_ACTB_1_SG, QuantiTect Primer Assay QT00095431, Qiagen | 146              | NM_001101                                                                                                                                                 |
